# Supplementary material for: Microwave-Assisted Freeze-Drying with Frequency-Based Control Concepts via Solid-State Generators: A Simulative and Experimental Study
Source: MDPI journal article supplement (doi:10.3390/pr11020327), 2023-01-19
Supplement: s1 [file s1]

## Supplementary Material

### Microwave-Assisted Freeze-Drying with Frequency-Based Control Concepts via Solid-State Generators. A Simulative and Experimental Study.

Till Sickert <sup>1,\*</sup>, Isabel Kalinke <sup>2,3</sup>, Jana Christoph <sup>1</sup> and Volker Gaukel <sup>1</sup>

<sup>1</sup> Institute of Process Engineering in Life Sciences, Food Process Engineering, Karlsruhe Institute of Technology, 76131 Karlsruhe, Germany

<sup>2</sup> Food and Bioprocess Engineering, TUM School of Life Sciences, Technical University of Munich, 85354 Freising, Germany

<sup>3</sup> Food Process Engineering, TUM School of Life Sciences, Technical University of Munich, 85354 Freising, Germany

\* Correspondence: till.sickert@kit.edu

**Table S1.** Frequencies utilized in the electromagnetic simulations in dependence on the control concept and drying state.

| Drying<br>state z / % | frequency f / GHz |                |                |                |                |                |                |
|-----------------------|-------------------|----------------|----------------|----------------|----------------|----------------|----------------|
|                       | 1MF               |                | 6EF            |                |                |                |                |
|                       | f <sub>1</sub>    | f <sub>1</sub> | f <sub>2</sub> | f <sub>3</sub> | f <sub>4</sub> | f <sub>5</sub> | f <sub>6</sub> |
| 0                     | 2.4255            | 2.4000         | 2.4200         | 2.4400         | 2.4600         | 2.4800         | 2.5000         |
| 10                    | 2.4263            | 2.4000         | 2.4200         | 2.4400         | 2.4600         | 2.4800         | 2.5000         |
| 20                    | 2.4272            | 2.4000         | 2.4200         | 2.4400         | 2.4600         | 2.4800         | 2.5000         |
| 30                    | 2.4283            | 2.4000         | 2.4200         | 2.4400         | 2.4600         | 2.4800         | 2.5000         |
| 40                    | 2.4296            | 2.4000         | 2.4200         | 2.4400         | 2.4600         | 2.4800         | 2.5000         |
| 50                    | 2.4310            | 2.4000         | 2.4200         | 2.4400         | 2.4600         | 2.4800         | 2.5000         |
| 60                    | 2.4326            | 2.4000         | 2.4200         | 2.4400         | 2.4600         | 2.4800         | 2.5000         |
| 70                    | 2.4343            | 2.4000         | 2.4200         | 2.4400         | 2.4600         | 2.4800         | 2.5000         |
| 80                    | 2.4362            | 2.4000         | 2.4200         | 2.4400         | 2.4600         | 2.4800         | 2.5000         |
| 90                    | 2.4455            | 2.4000         | 2.4200         | 2.4400         | 2.4600         | 2.4800         | 2.5000         |
| 100                   | 2.4418            | 2.4000         | 2.4200         | 2.4400         | 2.4600         | 2.4800         | 2.5000         |

  

| Drying<br>state z / % | 1RF            |                | 6RF            |                |                |                |                |
|-----------------------|----------------|----------------|----------------|----------------|----------------|----------------|----------------|
|                       | f <sub>1</sub> | f <sub>1</sub> | f <sub>2</sub> | f <sub>3</sub> | f <sub>4</sub> | f <sub>5</sub> | f <sub>6</sub> |
|                       | f <sub>1</sub> | f <sub>1</sub> | f <sub>2</sub> | f <sub>3</sub> | f <sub>4</sub> | f <sub>5</sub> | f <sub>6</sub> |
| 0                     | 2.4133         | 2.4071         | 2.4133         | 2.4438         | 2.4541         | 2.4698         | 2.4789         |
| 10                    | 2.4135         | 2.4100         | 2.4135         | 2.4444         | 2.4566         | 2.4701         | 2.4793         |
| 20                    | 2.4127         | 2.4127         | 2.4452         | 2.4523         | 2.4587         | 2.4704         | 2.4797         |
| 30                    | 2.4134         | 2.4012         | 2.4134         | 2.4459         | 2.4607         | 2.4706         | 2.4802         |
| 40                    | 2.4627         | 2.4036         | 2.4141         | 2.4468         | 2.4627         | 2.4708         | 2.4806         |
| 50                    | 2.4646         | 2.4063         | 2.4147         | 2.4478         | 2.4646         | 2.4710         | 2.4811         |
| 60                    | 2.4664         | 2.4153         | 2.4490         | 2.4531         | 2.4664         | 2.4712         | 2.4813         |
| 70                    | 2.4681         | 2.4158         | 2.4504         | 2.4531         | 2.4681         | 2.4714         | 2.4813         |
| 80                    | 2.4698         | 2.4163         | 2.4521         | 2.4534         | 2.4698         | 2.4715         | 2.4818         |
| 90                    | 2.4713         | 2.4002         | 2.4532         | 2.4542         | 2.4713         | 2.4717         | 2.4823         |
| 100                   | 2.4730         | 2.4014         | 2.4533         | 2.4566         | 2.4718         | 2.4730         | 2.4829         |

**Table S2.** Energy efficiencies of the frequencies utilized in the electromagnetic simulations in dependence on the control concept and drying state.

| Drying<br>state $z$ / % | Energy efficiency $\eta$ / % |       |       |       |       |       |       |
|-------------------------|------------------------------|-------|-------|-------|-------|-------|-------|
|                         | 1MF                          |       |       | 6EF   |       |       |       |
|                         | $f_1$                        | $f_1$ | $f_2$ | $f_3$ | $f_4$ | $f_5$ | $f_6$ |
| 0                       | 13.22                        | 59.52 | 17.43 | 28.55 | 39.93 | 57.71 | 28.51 |
| 10                      | 11.93                        | 58.71 | 17.19 | 22.29 | 53.54 | 56.26 | 23.10 |
| 20                      | 10.90                        | 62.66 | 18.35 | 17.83 | 75.28 | 54.74 | 18.62 |
| 30                      | 10.03                        | 53.56 | 19.52 | 14.64 | 82.91 | 52.86 | 15.46 |
| 40                      | 9.20                         | 40.05 | 18.58 | 12.50 | 58.88 | 50.48 | 12.97 |
| 50                      | 8.39                         | 33.48 | 21.87 | 12.01 | 35.96 | 47.66 | 11.07 |
| 60                      | 7.53                         | 33.69 | 27.30 | 15.29 | 24.10 | 43.92 | 9.51  |
| 70                      | 6.57                         | 43.18 | 16.36 | 12.16 | 18.54 | 39.10 | 8.19  |
| 80                      | 5.48                         | 71.91 | 11.52 | 6.57  | 16.53 | 33.44 | 7.14  |
| 90                      | 4.28                         | 96.18 | 8.31  | 4.36  | 17.81 | 26.76 | 5.93  |
| 100                     | 3.05                         | 41.30 | 6.35  | 3.10  | 26.52 | 18.92 | 4.43  |

  

| Drying<br>state $z$ / % | 1RF   |       |       | 6RF   |       |       |       |
|-------------------------|-------|-------|-------|-------|-------|-------|-------|
|                         | $f_1$ | $f_1$ | $f_2$ | $f_3$ | $f_4$ | $f_5$ | $f_6$ |
|                         | $f_1$ | $f_1$ | $f_2$ | $f_3$ | $f_4$ | $f_5$ | $f_6$ |
| 0                       | 99.27 | 93.43 | 99.27 | 80.95 | 77.68 | 54.47 | 60.12 |
| 10                      | 98.88 | 96.01 | 98.88 | 76.01 | 78.50 | 54.36 | 57.20 |
| 20                      | 99.96 | 99.96 | 70.58 | 28.40 | 81.91 | 54.78 | 54.86 |
| 30                      | 96.49 | 56.19 | 96.49 | 64.91 | 85.63 | 55.26 | 52.94 |
| 40                      | 89.11 | 48.31 | 87.68 | 59.54 | 89.11 | 56.30 | 51.35 |
| 50                      | 92.20 | 41.04 | 79.15 | 55.75 | 92.20 | 57.49 | 50.35 |
| 60                      | 94.81 | 72.90 | 54.73 | 38.04 | 94.81 | 59.63 | 50.08 |
| 70                      | 96.93 | 67.92 | 58.42 | 35.98 | 96.93 | 63.72 | 52.55 |
| 80                      | 98.46 | 61.95 | 69.35 | 39.48 | 98.46 | 74.28 | 60.23 |
| 90                      | 98.93 | 98.31 | 88.95 | 81.37 | 98.93 | 98.78 | 73.71 |
| 100                     | 99.72 | 91.67 | 58.94 | 98.89 | 57.39 | 99.72 | 91.68 |

**Table S3.** Frequencies and respective energy efficiencies utilized in the control concepts in the experiments with the laboratory-scale MFD system. The respective energy efficiencies and frequencies were determined as the arithmetic means from the process characterization by a frequency sweep in triplicate.

|                                 | 1MF    |        | 6EF    |        |        |        |        |
|---------------------------------|--------|--------|--------|--------|--------|--------|--------|
|                                 | $f_1$  | $f_1$  | $f_2$  | $f_3$  | $f_4$  | $f_5$  | $f_6$  |
| frequency<br>$f$ / GHz          | 2.4322 | 2.4000 | 2.4200 | 2.4400 | 2.4600 | 2.4800 | 2.5000 |
| energy efficiency<br>$\eta$ / % | 23.93  | 23.70  | 60.57  | 63.22  | 61.00  | 62.53  | 58.17  |

  

|                                 | 1RF    |        | 6RF    |        |        |        |        |
|---------------------------------|--------|--------|--------|--------|--------|--------|--------|
|                                 | $f_1$  | $f_1$  | $f_2$  | $f_3$  | $f_4$  | $f_5$  | $f_6$  |
| frequency<br>$f$ / GHz          | 2.4498 | 2.4498 | 2.4562 | 2.4652 | 2.4664 | 2.4725 | 2.4748 |
| energy efficiency<br>$\eta$ / % | 94.15  | 94.15  | 71.66  | 91.52  | 92.50  | 83.15  | 85.81  |
